# Supplementary material for: Collective dynamics of active circle-swimming Lennard–Jones particles
Source: Royal Society of Chemistry journal article supplement (doi:10.1039/d2cp01000c), 2022-01-01
Supplement: d2cp01000c1.pdf [file d2cp01000c1.pdf]

**Supplementary Information for “Collective dynamics of active circle-swimming  
Lennard-Jones particles”**

Bhadra Hrishikesh,<sup>\*a</sup> Ethayaraja Mani<sup>a‡</sup>

<sup>a</sup> *Department of Chemical Engineering, Indian Institute of Technology Madras, Chennai - 600  
036, Tamil Nadu, India; <sup>‡</sup>E-mail : ethaya@iitm.ac.in*

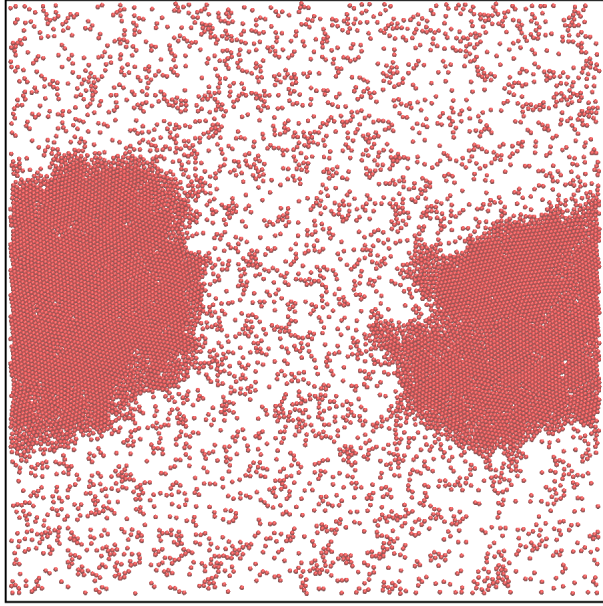

Figure S1: Representative configuration of the system for  $Pe = 140$ ,  $\omega^* = 0$ ,  $\epsilon^* = 3$  and  $N = 10000$ .

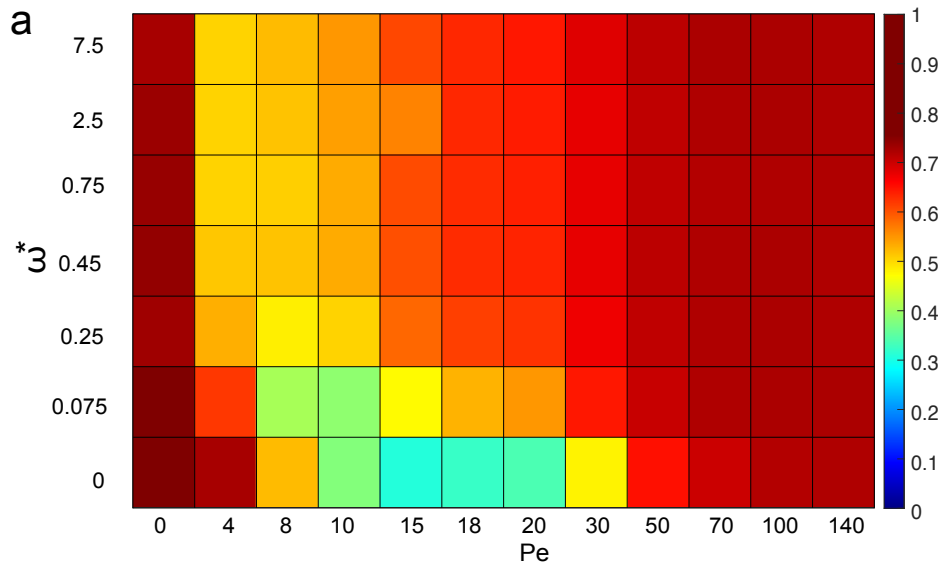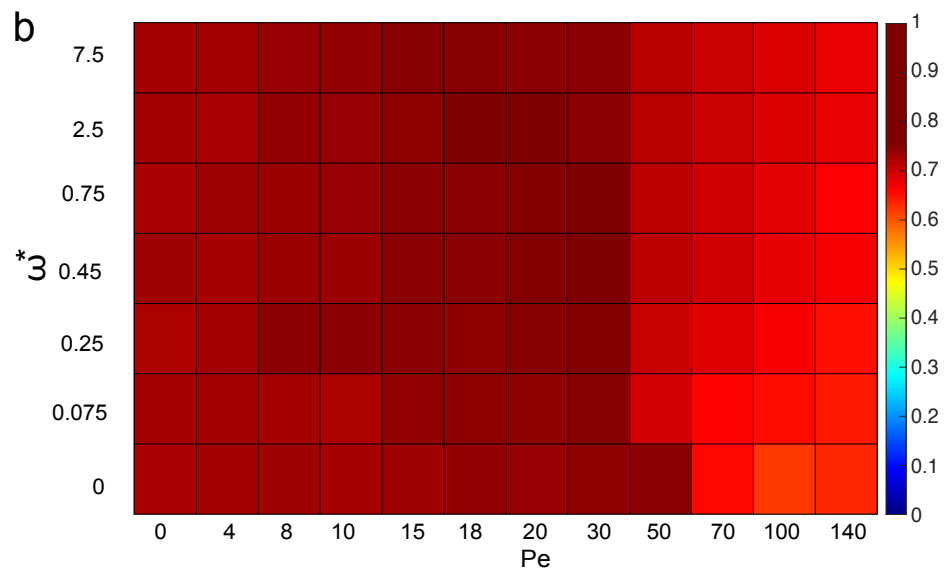

Figure S2: Color map of  $f_c$  in the  $(\omega^*, Pe)$  plane for a)  $\epsilon^* = 3$  and b)  $\epsilon^* = 25$

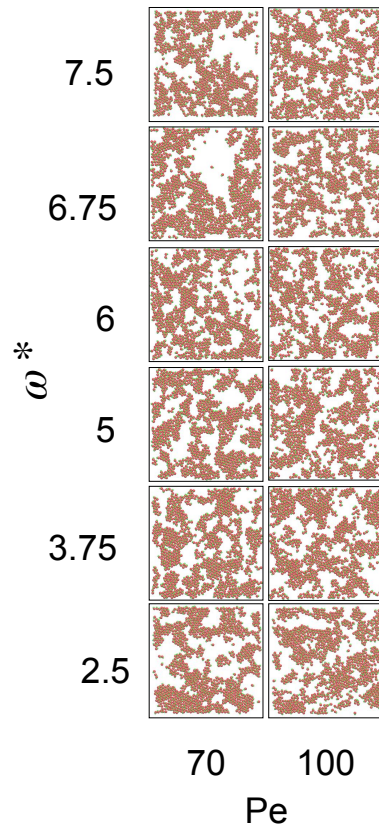

Figure S3: Representative configurations of the system at  $\epsilon^* = 25$  for  $Pe = 70$  and  $Pe = 100$  and different  $\omega^*$  values. Since the re-entrant phase cluster morphology is forming a percolated cluster (than a compact cluster at low  $\omega^*$ ), it is not discernible on a large scale.

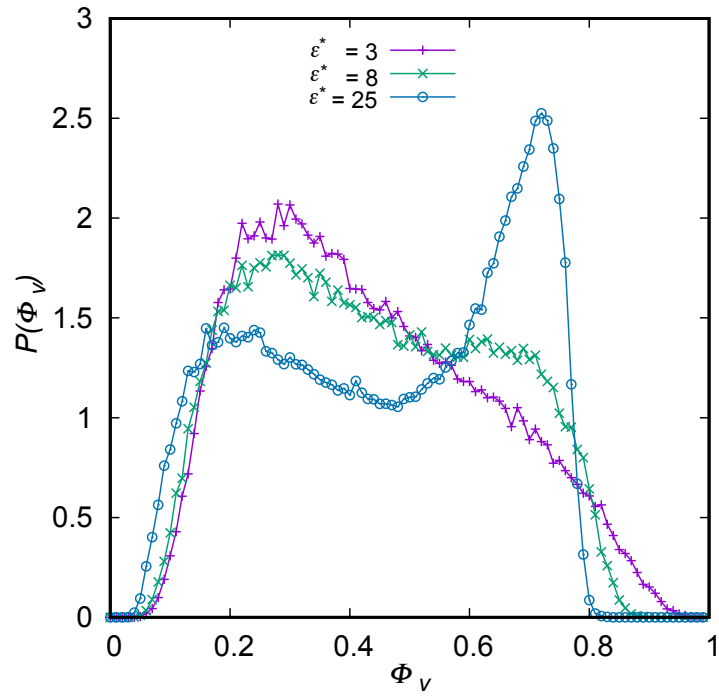

Figure S4: Probability distribution for  $\omega^* = 7.5$  and  $Pe = 140$  for different  $\epsilon^*$  values.
